# Supplementary material for: Projected Real‐World Effectiveness of Using Aggressive Low‐Density Lipoprotein Cholesterol Targets Among Elderly Statin Users Following Acute Coronary Syndromes in Canada
Source: PubMed Central journal article supplement — J Am Heart Assoc. 2018 May 12;7(10):e007535. doi: 10.1161/JAHA.117.007535 (PMC6015304; doi:10.1161/jaha.117.007535), 2018-05-12
Supplement: JAH3-7-e007535-s001.pdf [file JAH3-7-e007535-s001.pdf]

# **SUPPLEMENTAL MATERIAL**

**Table S1. The relationship between an individual’s statin intensity and the statin intensity at the end of study follow-up, among all patients, and among age-specific subgroups of less 75 years of age, and 75+ years).**

**Age Group: <75 yr**

| <b>Statin Intensity at the baseline vs. at the end of the study</b> |                                                 |             |               |               |              |
|---------------------------------------------------------------------|-------------------------------------------------|-------------|---------------|---------------|--------------|
| <b>Statin Intensity at baseline</b>                                 | <b>Statin Intensity at the end of the study</b> |             |               |               |              |
| <b>Frequency<br/>Row Pct</b>                                        | <b>Off</b>                                      | <b>Low</b>  | <b>Medium</b> | <b>High</b>   | <b>Total</b> |
| <b>Low</b>                                                          | 38<br>20.54                                     | 77<br>41.62 | 60<br>32.43   | 10<br>5.41    | <b>185</b>   |
| <b>Medium</b>                                                       | 446<br>14.27                                    | 58<br>1.86  | 2151<br>68.81 | 471<br>15.07  | <b>3126</b>  |
| <b>High</b>                                                         | 626<br>11.54                                    | 31<br>0.57  | 593<br>10.93  | 4176<br>76.96 | <b>5426</b>  |
| <b>Total</b>                                                        | <b>1110</b>                                     | <b>166</b>  | <b>2804</b>   | <b>4657</b>   | <b>8737</b>  |

The median number (Interquartile range) of statin prescriptions filled during follow-up among patients age 75 years and older was 15 (7-19).

**Age Group: 75+ yr**

| <b>Statin Intensity at the baseline vs. at the end of the study</b> |                                                 |              |               |               |              |
|---------------------------------------------------------------------|-------------------------------------------------|--------------|---------------|---------------|--------------|
| <b>Statin Intensity at baseline</b>                                 | <b>Statin Intensity at the end of the study</b> |              |               |               |              |
| <b>Frequency<br/>Row Pct</b>                                        | <b>Off</b>                                      | <b>Low</b>   | <b>Medium</b> | <b>High</b>   | <b>Total</b> |
| <b>Low</b>                                                          | 84<br>22.52                                     | 198<br>53.08 | 73<br>19.57   | 18<br>4.83    | <b>373</b>   |
| <b>Medium</b>                                                       | 908<br>18.7                                     | 52<br>1.07   | 3500<br>72.09 | 395<br>8.14   | <b>4855</b>  |
| <b>High</b>                                                         | 910<br>16.31                                    | 38<br>0.68   | 658<br>11.79  | 3973<br>71.21 | <b>5579</b>  |
| <b>Total</b>                                                        | <b>1902</b>                                     | <b>288</b>   | <b>4231</b>   | <b>4386</b>   | <b>10807</b> |

The median number (Interquartile range) of statin prescriptions filled during follow-up among patients age 75 years and older was 16 (7-39).

All patients:

| Statin Intensity at the baseline vs. at the end of the study |                                          |              |               |               |              |
|--------------------------------------------------------------|------------------------------------------|--------------|---------------|---------------|--------------|
| Statin Intensity at baseline                                 | Statin Intensity at the end of the study |              |               |               |              |
| Frequency<br>Row Pct                                         | Off                                      | Low          | Medium        | High          | Total        |
| <b>Low</b>                                                   | 122<br>21.86                             | 275<br>49.28 | 133<br>23.84  | 28<br>5.02    | <b>558</b>   |
| <b>Medium</b>                                                | 1354<br>16.97                            | 110<br>1.38  | 5651<br>70.81 | 866<br>10.85  | <b>7981</b>  |
| <b>High</b>                                                  | 1536<br>13.96                            | 69<br>0.63   | 1251<br>11.37 | 8149<br>74.05 | <b>11005</b> |
| <b>Total</b>                                                 | <b>3012</b>                              | <b>454</b>   | <b>7035</b>   | <b>9043</b>   | <b>19544</b> |

Figure S1. The schematic diagram of the study design.

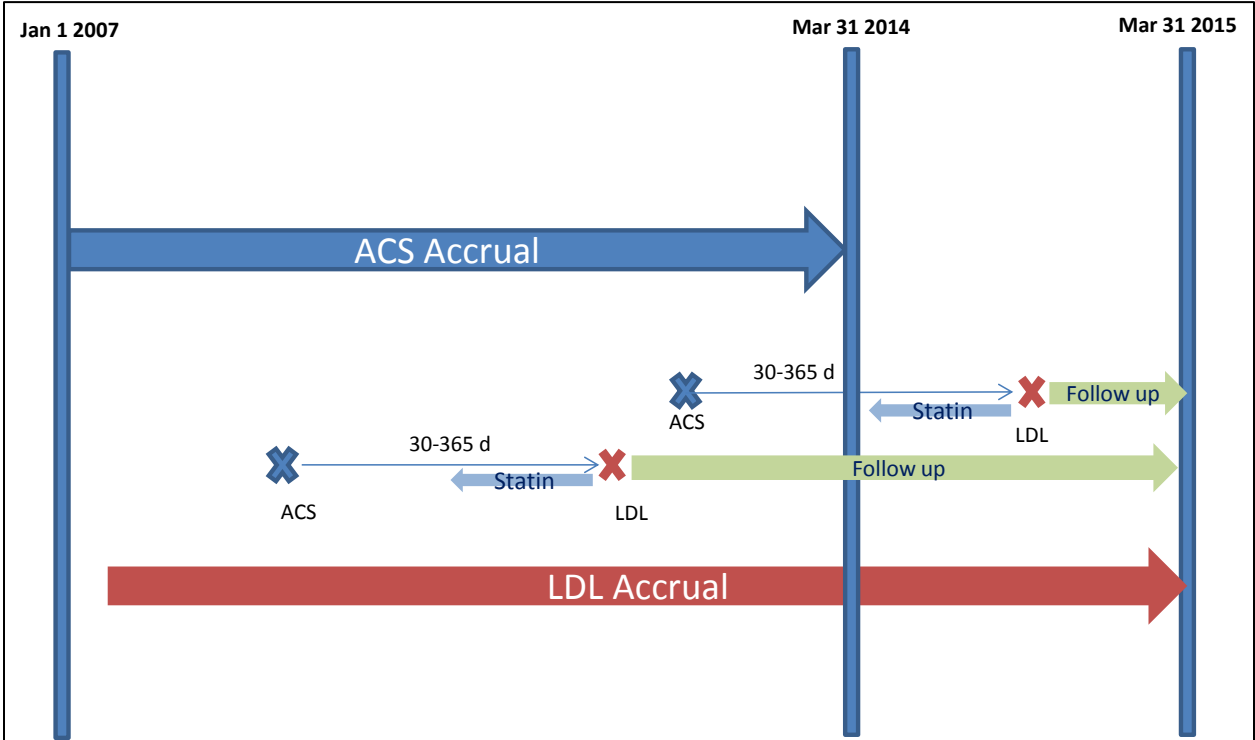

ACS=Acute Coronary Syndromes  
LDL=Low-density Lipoprotein Cholesterol

**Figure S2. The distribution of LDL cholesterol during the first and last measurements among patients less than 75 years old, and those 75 years of age and older.**

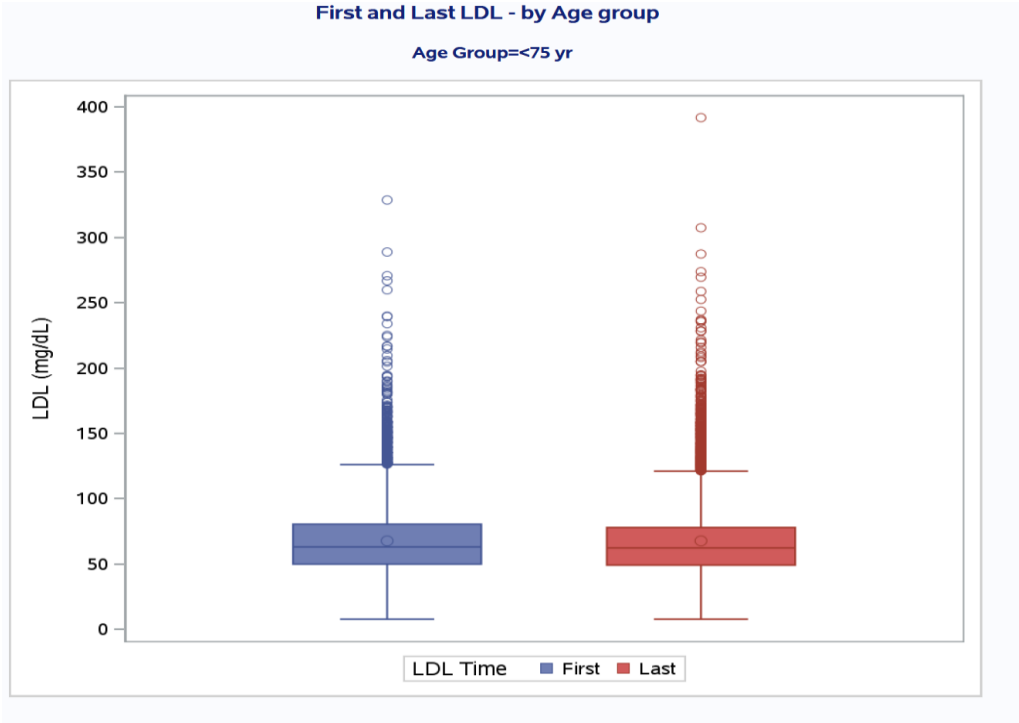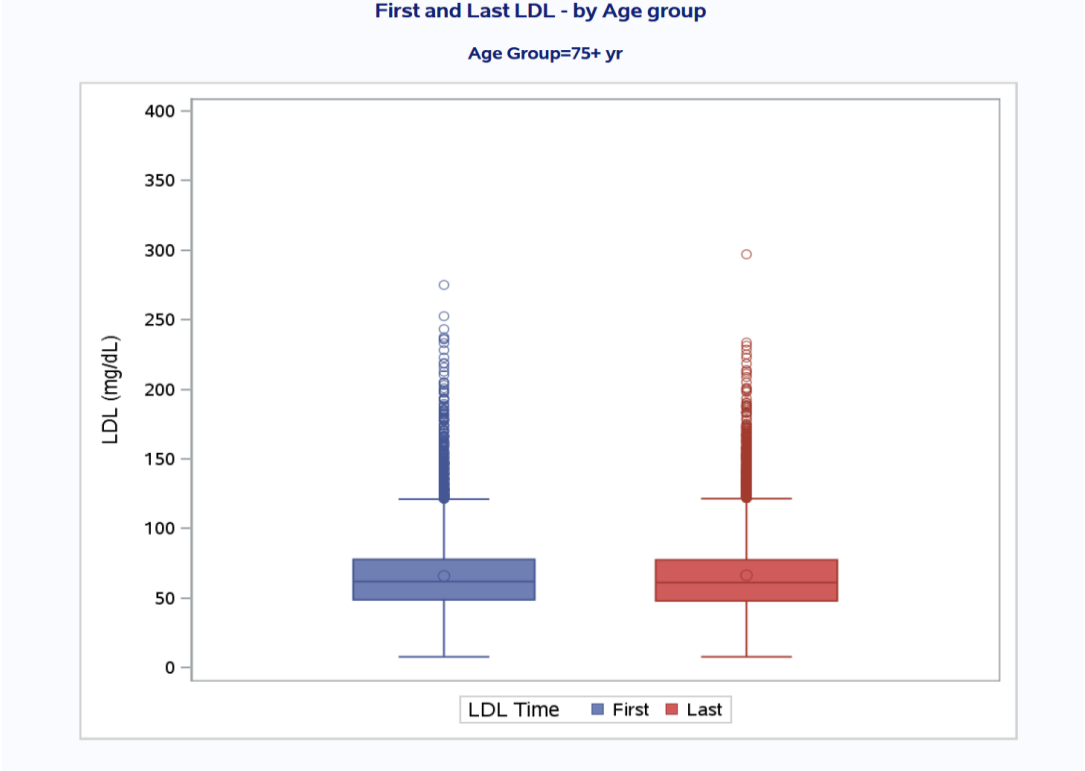

LDL=Low-Density Lipoprotein Cholesterol
